# Supplementary material for: MicroRNA regulation and its effects on cellular transcriptome in Human Immunodeficiency Virus-1 (HIV-1) infected individuals with distinct viral load and CD4 cell counts
Source: PubMed Central journal article supplement (PMC3680326; doi:10.1186/1471-2334-13-250), 2013-05-30
Supplement: 1471-2334-13-250-S1.pdf [file 1471-2334-13-250-S1.pdf]

**Table S1: Differentially regulated miRNA in low and high viral load groups compared to uninfected control group u**

| Control vs. Low viral load |            |             | Control vs. How viral load |            |              |
|----------------------------|------------|-------------|----------------------------|------------|--------------|
| miRNA                      | p-value    | Fold Change | miRNA                      | p-value    | Fold Change  |
| hsa-let-7f-2#-002418       | 1.46E-02   | 6.7013      | dme-miR-7-000268           | 1.26E-07   | 13.87493014  |
| hsa-let-7i#-002172         | 4.11E-02   | 3.6956      | has-miR-1305-002867        | 5.30E-11   | 4078.263417  |
| hsa-miR-1183-002841        | 2.80E-02   | 4.5678      | has-miR-155-4395459        | 1.03E-04   | 16.77843025  |
| hsa-miR-124#-002197        | 4.35E-04   | 248.4524    | hsa-let-7d-4395394         | 2.03E-02   | 4.085508578  |
| hsa-miR-1250-002887        | 2.80E-02   | -10.6284    | hsa-let-7g-4395393         | 1.19E-02   | 8.761654982  |
| hsa-miR-1257-002910        | 4.00E-02   | 7.7877      | hsa-miR-1-4395333          | 4.02E-02   | 6.882940744  |
| hsa-miR-1260-002896        | 3.99E-02   | 5.6598      | hsa-miR-106b#-002380       | 3.86E-02   | 2.748504713  |
| hsa-miR-1262-002852        | 4.13E-04   | -1117.8098  | hsa-miR-10a-4373153        | 1.58E-03   | 4.581427036  |
| hsa-miR-1275-002840        | 2.84E-02   | 6.2628      | hsa-miR-10b#-002315        | 4.80E-02   | 2.53059669   |
| hsa-miR-1291-002838        | 1.46E-02   | 5.1285      | hsa-miR-1180-002847        | 0.01589604 | 3.43495718   |
| hsa-miR-1303-002792        | 2.47E-02   | 7.4270      | hsa-miR-1183-002841        | 2.17E-06   | 12.66847663  |
| hsa-miR-1304-002874        | 4.61E-06   | 113010.9935 | hsa-miR-1201-002781        | 1.12E-03   | 5.399767917  |
| hsa-miR-138-2#-002144      | 2.27E-03   | 8.7629      | hsa-miR-1225-3P-002766     | 4.67E-13   | 26.45485442  |
| hsa-miR-146a#-002163       | 2.58E-02   | -23.2904    | hsa-miR-1227-002769        | 1.49E-02   | 3.83979813   |
| hsa-miR-147-4373131        | 9.45E-03   | -7.2747     | hsa-miR-124-4373295        | 1.58E-10   | 63.94441338  |
| hsa-miR-148b#-002160       | 1.30E-02   | 3.5335      | hsa-miR-1245-002823        | 1.42E-03   | 16845.46439  |
| hsa-miR-151-3p-002254      | 3.99E-02   | 3.5268      | hsa-miR-1247-002893        | 5.57E-04   | 49.53915351  |
| hsa-miR-16-4373121         | 4.13E-02   | 14.2221     | hsa-miR-1253-002894        | 1.45E-07   | 17.03468336  |
| hsa-miR-18b#-002310        | 2.58E-02   | -27.6037    | hsa-miR-1254-002818        | 1.21E-04   | 4.637792173  |
| hsa-miR-191#-002678        | 1.63E-02   | 4.4852      | hsa-miR-1255B-002801       | 8.44E-04   | 4.921461872  |
| hsa-miR-194#-002379        | 2.27E-03   | 13.6655     | hsa-miR-125b-1#-002378     | 0.022202   | 4.461441295  |
| hsa-miR-21#-002438         | 2.27E-03   | 6.6638      | hsa-miR-1260-002896        | 9.72E-03   | 5.8778463    |
| hsa-miR-219-1-3p-4395;     | 4.01E-02   | 3.6289      | hsa-miR-1262-002852        | 2.66E-02   | -6.03E+01    |
| hsa-miR-220b-4395317       | 2.24E-02   | 37.1120     | hsa-miR-1267-002885        | 2.62E-02   | -2.01E+01    |
| hsa-miR-376b-4373196       | 1.46E-02   | 10.7415     | hsa-miR-127-3p-4373147     | 2.89E-02   | 3.184511612  |
| hsa-miR-454#-001996        | 1.82E-03   | 3.1752      | hsa-miR-1270-002807        | 3.39E-03   | 5.801833768  |
| hsa-miR-483-5p-439544      | 4.10E-03   | 5.9692      | hsa-miR-1271-002779        | 1.18E-04   | 3.039572182  |
| hsa-miR-524-5p-439517      | 0.00887708 | 10.0835     | hsa-miR-1274A-002883       | 6.05E-05   | 4.466481817  |
| hsa-miR-542-5p-439535      | 2.47E-02   | 4.6363      | hsa-miR-1275-002840        | 7.47E-05   | 17.07456456  |
| hsa-miR-548c-3p-43809      | 1.46E-02   | -5.9144     | hsa-miR-1276-002843        | 1.96E-06   | 10.48095323  |
| hsa-miR-550-002410         | 4.10E-03   | 4.0567      | hsa-miR-1282-002803        | 6.59E-04   | 4.775920011  |
| hsa-miR-584-001624         | 6.72E-03   | 13.7803     | hsa-miR-1283-002890        | 1.03E-02   | 5.667040929  |
| hsa-miR-649-001602         | 1.40E-02   | 8.1867      | hsa-miR-1284-002903        | 3.69E-05   | 50132.86392  |
| hsa-miR-650-001603         | 3.15E-02   | 5.9026      | hsa-miR-1285-002822        | 5.15E-03   | 10.09637943  |
| hsa-miR-744#-002325        | 1.46E-03   | 5.0088      | hsa-miR-1290-002863        | 4.19E-05   | 5.121944982  |
| hsa-miR-92b#-002343        | 1.17E-02   | 5.6695      | hsa-miR-1291-002838        | 4.33E-04   | 4.347958775  |
| hsa-miR-93#-002139         | 2.84E-02   | 3.0965      | hsa-miR-1298-002861        | 1.78E-03   | 18.83721058  |
| hsa-miR-938-002181         | 2.60E-04   | 20.48072181 | hsa-miR-1300-002902        | 1.50E-03   | 4.714974603  |
| hsa-miR-941-002183         | 4.59E-02   | 3.969513229 | hsa-miR-1303-002792        | 4.67E-13   | 137.2051535  |
| rno-miR-29c#-001818        | 4.00E-02   | 3.972610169 | hsa-miR-130b-4373144       | 1.48E-02   | 2.550489557  |
| rno-miR-7#-001338          | 3.02E-02   | 5.602637467 | hsa-miR-130b#-002114       | 1.05E-04   | -7.371873741 |
|                            |            |             | hsa-miR-132-4373143        | 3.14E-07   | 12.91743135  |
|                            |            |             | hsa-miR-134-4373299        | 3.38E-02   | -2.737199743 |
|                            |            |             | hsa-miR-135b-4395372       | 5.43E-03   | 4.194801661  |
|                            |            |             | hsa-miR-138-2#-002144      | 7.47E-05   | 14.75599593  |
|                            |            |             | hsa-miR-140-5p-4373374     | 1.19E-02   | 3.043312478  |
|                            |            |             | hsa-miR-142-3p-4373136     | 6.03E-03   | 10.84376544  |
|                            |            |             | hsa-miR-143#-002146        | 9.18E-03   | -5.76E+01    |

|                        |            |              |
|------------------------|------------|--------------|
| hsa-miR-144-002676     | 5.08E-06   | -2.57E+01    |
| hsa-miR-146a-4373132   | 9.83E-03   | 10.80949113  |
| hsa-miR-146a#-002163   | 0.04632034 | -6.126977814 |
| hsa-miR-146b-3p-439547 | 2.31E-05   | 6.026408157  |
| hsa-miR-148a#-002134   | 2.41E-02   | -8.98E+01    |
| hsa-miR-148b#-002160   | 7.62E-03   | 3.112987387  |
| hsa-miR-151-5P-002642  | 1.50E-03   | 6.110985331  |
| hsa-miR-152-4395170    | 1.90E-03   | 5.262731632  |
| hsa-miR-155#-002287    | 1.78E-05   | 7.634857628  |
| hsa-miR-15a-4373123    | 2.23E-02   | 4.920624402  |
| hsa-miR-16-4373121     | 1.20E-02   | 16.03235967  |
| hsa-miR-181a-4373117   | 2.26E-03   | 7.415476638  |
| hsa-miR-181c-4373115   | 0.01298629 | 2.897475766  |
| hsa-miR-1826-002873    | 1.08E-02   | -3.98E+01    |
| hsa-miR-185-4395382    | 0.01014398 | 4.102689273  |
| hsa-miR-186-4395396    | 1.24E-02   | 3.861430231  |
| hsa-miR-18a#-002423    | 2.02E-02   | 2.405851326  |
| hsa-miR-18b#-002310    | 2.14E-02   | -1.58E+01    |
| hsa-miR-191#-002678    | 3.49E-03   | 5.955901492  |
| hsa-miR-193a-5p-439539 | 2.17E-06   | 13.71013761  |
| hsa-miR-193b-4395478   | 1.50E-03   | 6.808706875  |
| hsa-miR-194-4373106    | 2.31E-03   | 4.86958654   |
| hsa-miR-195-4373105    | 2.46E-02   | 3.99362515   |
| hsa-miR-19a-4373099    | 2.37E-02   | 7.675342781  |
| hsa-miR-19b-1#-002425  | 1.00E-02   | 2.760137509  |
| hsa-miR-19b-4373098    | 1.28E-02   | 13.55178785  |
| hsa-miR-200b-4395362   | 4.10E-03   | 4.735897947  |
| hsa-miR-200c-4395411   | 3.66E-02   | 3.789084891  |
| hsa-miR-202-4395474    | 9.92E-04   | 5.237766018  |
| hsa-miR-206-000510     | 1.16E-03   | 3.751404947  |
| hsa-miR-20a-4373286    | 1.08E-02   | 10.18643945  |
| hsa-miR-20b-4373263    | 1.97E-02   | 3.318840304  |
| hsa-miR-21-4373090     | 3.51E-06   | 6.153184848  |
| hsa-miR-21#-002438     | 4.03E-05   | 7.890314935  |
| hsa-miR-210-4373089    | 1.21E-04   | 10.53561414  |
| hsa-miR-211-4373088    | 1.67E-02   | 3.032928462  |
| hsa-miR-212-4373087    | 7.74E-08   | 7.200668369  |
| hsa-miR-214-4395417    | 2.77E-02   | -5.073381256 |
| hsa-miR-219-5p-4373080 | 3.22E-02   | 5.070692526  |
| hsa-miR-22-4373079     | 4.47E-05   | 15.41125223  |
| hsa-miR-22#-002301     | 4.08E-02   | 1.767145887  |
| hsa-miR-220c-4395322   | 8.59E-06   | 35101.94716  |
| hsa-miR-221#-002096    | 1.81E-02   | 4.24639961   |
| hsa-miR-222-4395387    | 1.70E-06   | 4.886975108  |
| hsa-miR-223-4395406    | 5.58E-03   | -2.053736221 |
| hsa-miR-24-2#-002441   | 1.70E-02   | 2.785808093  |
| hsa-miR-25-4373071     | 1.17E-03   | 2.892958643  |
| hsa-miR-27a-4373287    | 4.32E-02   | 2.42853155   |
| hsa-miR-27a#-002445    | 1.13E-03   | 2.029079327  |
| hsa-miR-28-3p-4395557  | 7.98E-04   | 1.956747885  |
| hsa-miR-28-5p-4373067  | 8.00E-03   | 3.894108308  |
| hsa-miR-29a-4395223    | 3.98E-02   | 2.907401442  |
| hsa-miR-29a#-002447    | 2.66E-02   | 2.855672718  |

|                            |            |              |
|----------------------------|------------|--------------|
| hsa-miR-29b-1#-002165      | 1.19E-04   | 7.589387316  |
| hsa-miR-29b-2#-002166      | 6.75E-03   | 6.468322348  |
| hsa-miR-29b-4373288        | 2.07E-02   | 3.555525305  |
| hsa-miR-302a#-002381       | 5.15E-03   | 5.623309117  |
| hsa-miR-302d#-002120       | 3.73E-04   | 24.89965354  |
| hsa-miR-30a-5p-000417      | 4.08E-02   | 3.790306502  |
| hsa-miR-30b-4373290        | 1.83E-02   | 7.280247288  |
| hsa-miR-30c-2#-002110      | 2.17E-06   | 15966.80801  |
| hsa-miR-31#-002113         | 1.97E-02   | -2.718469803 |
| hsa-miR-320B-002844        | 4.38E-03   | 6.78329652   |
| hsa-miR-324-3p-4395272     | 5.61E-04   | 5.661842061  |
| hsa-miR-324-5p-4373052     | 2.28E-03   | 5.166228874  |
| hsa-miR-330-3p-4373047     | 4.43E-03   | 3.603381132  |
| hsa-miR-331-3p-4373046     | 3.19E-02   | 4.597970825  |
| hsa-miR-335#-002185        | 3.04E-03   | 4.615719507  |
| hsa-miR-337-5p-4395267     | 2.37E-02   | 3.097516585  |
| hsa-miR-338-5P-002658      | 2.41E-04   | 136.4889816  |
| hsa-miR-339-5p-4395368     | 3.72E-03   | 3.323813895  |
| hsa-miR-33a#-002136        | 1.81E-02   | 2.468964194  |
| hsa-miR-342-3p-4395371     | 4.08E-02   | 6.912106508  |
| hsa-miR-342-5p-4395258     | 9.42E-05   | 9.713559075  |
| hsa-miR-346-4373038        | 1.70E-06   | 22.98164868  |
| <b>hsa-miR-34a-4395168</b> | 1.53E-05   | 20.67824891  |
| hsa-miR-34a#-002316        | 4.02E-02   | 3.039632595  |
| hsa-miR-34b-002102         | 4.29E-04   | 3.23882279   |
| hsa-miR-361-3p-002116      | 1.30E-02   | 3.749723066  |
| hsa-miR-361-5p-4373035     | 2.62E-02   | 2.807058518  |
| hsa-miR-362-5p-4378092     | 4.09E-02   | 2.870256481  |
| hsa-miR-363-4378090        | 4.91E-03   | 3.354433159  |
| hsa-miR-375-4373027        | 2.37E-02   | -3.152605833 |
| hsa-miR-376a-4373026       | 1.85E-02   | -2.638532334 |
| hsa-miR-376b-4373196       | 4.51E-02   | 2.941008912  |
| hsa-miR-378-000567         | 1.21E-04   | 6.368024463  |
| hsa-miR-380-5p-000570      | 1.90E-03   | 7.670777208  |
| hsa-miR-381-4373020        | 9.03E-05   | 7.343627248  |
| hsa-miR-382-4373019        | 5.82E-04   | 7.736485404  |
| hsa-miR-424-4373201        | 1.45E-03   | 4.817213696  |
| hsa-miR-425-4380926        | 7.25E-03   | 6.524155727  |
| hsa-miR-433-4373205        | 1.70E-06   | 14.27815737  |
| hsa-miR-451-4373360        | 1.19E-02   | -4.362941336 |
| hsa-miR-483-5p-4395449     | 2.05E-07   | 17.08813375  |
| hsa-miR-486-3p-4395204     | 4.08E-02   | 3.361467958  |
| hsa-miR-487a-4378097       | 4.02E-02   | 2.507611098  |
| hsa-miR-488-4395468        | 0.01614418 | 3.553588546  |
| hsa-miR-490-3p-4373215     | 5.64E-06   | 18.23678574  |
| hsa-miR-491-5p-4381053     | 2.77E-03   | 3.053787051  |
| hsa-miR-500-4395539        | 1.76E-04   | 3.926214216  |
| hsa-miR-501-5p-4373226     | 3.32E-03   | 5.65556144   |
| hsa-miR-502-5p-4373227     | 1.85E-03   | 3.471441708  |
| hsa-miR-503-4373228        | 4.80E-02   | -3.256553387 |
| hsa-miR-505-4395200        | 3.36E-02   | 3.307064251  |
| hsa-miR-509-5p-4395346     | 5.87E-03   | 5.46227271   |
| hsa-miR-511-4373236        | 1.38E-04   | 8.235456181  |

|                        |            |              |
|------------------------|------------|--------------|
| hsa-miR-512-3p-4381034 | 2.98E-02   | 3.942236524  |
| hsa-miR-513C-002756    | 4.43E-03   | 6.083801086  |
| hsa-miR-516-3p-001149  | 3.38E-02   | 2.948377281  |
| hsa-miR-516b-4395172   | 1.75E-06   | 10.1034214   |
| hsa-miR-518b-4373246   | 1.54E-11   | 32.72885076  |
| hsa-miR-518d-3p-437324 | 4.91E-03   | 4.867234049  |
| hsa-miR-518e-4395506   | 8.69E-03   | 4.284690095  |
| hsa-miR-519e#-001166   | 0.00438143 | 32.1623535   |
| hsa-miR-524-5p-4395174 | 6.37E-03   | 7.667536858  |
| hsa-miR-525-3p-4395496 | 1.10E-02   | 4.05560743   |
| hsa-miR-541-4395312    | 8.65E-03   | 6.521780014  |
| hsa-miR-551b#-002346   | 2.25E-02   | 2.373094766  |
| hsa-miR-552-001520     | 2.77E-02   | -3.749805561 |
| hsa-miR-554-001522     | 1.00E-02   | -3.942699002 |
| hsa-miR-564-001531     | 1.70E-06   | 11.66701669  |
| hsa-miR-571-001613     | 1.45E-07   | 23.50474181  |
| hsa-miR-572-001614     | 2.28E-03   | 5.38342451   |
| hsa-miR-575-001617     | 6.71E-03   | 6.335867279  |
| hsa-miR-579-4395509    | 1.81E-02   | 2.867363702  |
| hsa-miR-584-001624     | 5.32E-05   | 34.84067614  |
| hsa-miR-589-001543     | 9.02E-03   | 3.40504916   |
| hsa-miR-596-001550     | 3.95E-05   | 4.738045703  |
| hsa-miR-598-4395179    | 1.19E-02   | 4.064260377  |
| hsa-miR-605-001568     | 1.27E-08   | 29.05944982  |
| hsa-miR-607-001570     | 5.13E-03   | 4.612443395  |
| hsa-miR-615-3p-4386777 | 1.55E-04   | 51.37002386  |
| hsa-miR-615-5p-4395464 | 0.0278837  | 4.806302391  |
| hsa-miR-621-001598     | 8.01E-03   | 19.25685773  |
| hsa-miR-622-001553     | 1.82E-02   | 6.320200953  |
| hsa-miR-623-001555     | 3.78E-08   | 35.23526181  |
| hsa-miR-626-001559     | 4.97E-02   | -5.613064084 |
| hsa-miR-631-001564     | 6.25E-03   | -9.001941012 |
| hsa-miR-636-4395199    | 0.03251524 | 3.047789873  |
| hsa-miR-638-001582     | 1.84E-05   | 14.71255401  |
| hsa-miR-639-001583     | 1.53E-03   | 5.451818205  |
| hsa-miR-642-4380995    | 7.47E-05   | 3.648423737  |
| hsa-miR-643-001594     | 1.95E-03   | 6.814748402  |
| hsa-miR-644-001596     | 0.01614418 | 4.019401608  |
| hsa-miR-645-001597     | 7.78E-03   | -1.53E+01    |
| hsa-miR-650-001603     | 1.47E-05   | 18.03793605  |
| hsa-miR-652-4395463    | 5.30E-04   | 6.066535113  |
| hsa-miR-654-3p-4395350 | 3.17E-02   | 3.459684983  |
| hsa-miR-655-4381015    | 1.58E-02   | 6.574134967  |
| hsa-miR-658-001513     | 1.00E-03   | 256074.4728  |
| hsa-miR-659-001514     | 1.97E-04   | 25.33061999  |
| hsa-miR-660-4380925    | 7.78E-03   | 6.452092068  |
| hsa-miR-661-001606     | 2.09E-05   | 12.97419819  |
| hsa-miR-668-001992     | 4.32E-03   | -4.471952976 |
| hsa-miR-671-3p-4395433 | 4.08E-02   | 2.612865055  |
| hsa-miR-672-4395438    | 4.47E-07   | 21.23813422  |
| hsa-miR-744#-002325    | 1.58E-03   | 4.235715628  |
| hsa-miR-766-001986     | 2.14E-02   | 2.018251179  |
| hsa-miR-769-5p-001998  | 1.08E-02   | 3.038207553  |

|                        |            |             |
|------------------------|------------|-------------|
| hsa-miR-770-5p-002002  | 1.27E-03   | 7.690015783 |
| hsa-miR-886-3p-4395305 | 0.00767989 | 4.26141862  |
| hsa-miR-9-4373285      | 9.42E-05   | 10.66248145 |
| hsa-miR-9#-002231      | 0.04493089 | 1.992987685 |
| hsa-miR-92a-4395169    | 4.29E-03   | 6.816814242 |
| hsa-miR-93-4373302     | 1.00E-02   | 4.213684912 |
| hsa-miR-93#-002139     | 5.51E-03   | 3.270610677 |
| hsa-miR-933-002176     | 1.03E-05   | -3.18E+01   |
| hsa-miR-935-002178     | 1.79E-08   | -2.24E+01   |
| hsa-miR-938-002181     | 2.19E-04   | 10.36194252 |
| hsa-miR-939-002182     | 2.57E-05   | 37.01043571 |
| hsa-miR-99b#-002196    | 3.46E-04   | 5.686864826 |
| rno-miR-29c#-001818    | 1.52E-02   | 3.085864535 |
| rno-miR-7#-001338      | 0.00980813 | 5.9249569   |

using two Statminer software with statistical significance.

### Low viral load vs. High viral load

| miRNA                  | p-value     | Fold Change  |
|------------------------|-------------|--------------|
| dme-miR-7-000268       | 3.62E-03    | 4.1039       |
| has-miR-1305-002867    | 7.97E-12    | 6460.409753  |
| has-miR-155-4395459    | 8.08E-07    | 3.236641822  |
| hsa-miR-103-4373158    | 1.85E-02    | 2.526795861  |
| hsa-miR-106b-4373155   | 2.01E-02    | 2.431595935  |
| hsa-miR-107-4373154    | 1.95E-02    | 3.359706855  |
| hsa-miR-10a-4373153    | 1.59E-04    | 5.45571071   |
| hsa-miR-1183-002841    | 4.45E-02    | 2.773408027  |
| hsa-miR-1201-002781    | 0.008733965 | 2.962047272  |
| hsa-miR-1206-002878    | 6.17E-03    | 30.38398055  |
| hsa-miR-1225-3P-002766 | 3.09E-09    | 18.29619753  |
| hsa-miR-1227-002769    | 2.01E-05    | 4.857376948  |
| hsa-miR-1233-002768    | 1.22E-02    | 3.214222937  |
| hsa-miR-124-4373295    | 5.07E-03    | 10.58794609  |
| hsa-miR-124#-002197    | 7.04E-05    | -3.64E+02    |
| hsa-miR-1245-002823    | 4.31E-04    | 8396.381156  |
| hsa-miR-1247-002893    | 3.31E-04    | 37.27352435  |
| hsa-miR-1248-002870    | 4.27E-02    | 3.028911809  |
| hsa-miR-1253-002894    | 8.31E-03    | 4.798619994  |
| hsa-miR-1254-002818    | 1.39E-02    | 3.189952687  |
| hsa-miR-1262-002852    | 3.40E-02    | 18.53709627  |
| hsa-miR-1267-002885    | 1.25E-02    | -6.91E+01    |
| hsa-miR-127-3p-4373147 | 1.93E-02    | 3.692981118  |
| hsa-miR-1270-002807    | 3.25E-04    | 8.968718696  |
| hsa-miR-1271-002779    | 1.65E-02    | 2.137997236  |
| hsa-miR-1274B-002884   | 9.93E-03    | 2.515736434  |
| hsa-miR-1275-002840    | 0.018152174 | 2.726344656  |
| hsa-miR-1276-002843    | 0.027036811 | 3.231765935  |
| hsa-miR-1282-002803    | 3.53E-05    | 11.32979676  |
| hsa-miR-1284-002903    | 4.83E-03    | 36806.94177  |
| hsa-miR-1303-002792    | 1.18E-04    | 18.47390493  |
| hsa-miR-1304-002874    | 8.96E-05    | -2.55E+04    |
| hsa-miR-130a-4373145   | 1.52E-02    | 3.455599164  |
| hsa-miR-130b-4373144   | 1.52E-02    | 2.321009777  |
| hsa-miR-130b#-002114   | 6.47E-04    | -9.048925905 |
| hsa-miR-132-4373143    | 8.80E-09    | 7.857541172  |
| hsa-miR-1324-002815    | 1.18E-02    | -4.997183674 |
| hsa-miR-134-4373299    | 1.09E-03    | -7.84704976  |
| hsa-miR-135b-4395372   | 4.00E-03    | 3.273375588  |
| hsa-miR-140-5p-4373374 | 3.38E-02    | 2.240430968  |
| hsa-miR-142-3p-4373136 | 2.20E-03    | 4.096011999  |
| hsa-miR-143#-002146    | 4.58E-03    | -1.06E+01    |
| hsa-miR-144-002676     | 2.41E-04    | -21.7712014  |
| hsa-miR-144#-002148    | 1.22E-02    | -3.957074571 |
| hsa-miR-146a-4373132   | 2.28E-02    | 1.841304579  |
| hsa-miR-146a#-002163   | 3.46E-02    | 3.801279833  |
| hsa-miR-146b-3p-439547 | 9.63E-04    | 5.38274824   |
| hsa-miR-147-4373131    | 4.73E-02    | 3.058556428  |

|                           |             |              |
|---------------------------|-------------|--------------|
| hsa-miR-148b-4373129      | 1.64E-02    | 2.344156497  |
| hsa-miR-151-5P-002642     | 4.22E-02    | 1.92641438   |
| hsa-miR-152-4395170       | 5.44E-04    | 4.233219469  |
| hsa-miR-15a#-002419       | 4.78E-03    | -3.232795969 |
| hsa-miR-181a-4373117      | 1.53E-03    | 3.159795141  |
| hsa-miR-181c-4373115      | 4.27E-02    | 2.291146637  |
| hsa-miR-1825-002907       | 1.22E-02    | 18.09063636  |
| hsa-miR-1826-002873       | 3.40E-02    | -2.756201259 |
| hsa-miR-183#-002270       | 0.049399725 | -4.521519815 |
| hsa-miR-191-4395410       | 5.81E-05    | -2.353713359 |
| hsa-miR-193a-5p-439539:   | 2.56E-04    | 9.871053529  |
| hsa-miR-193b-4395478      | 1.22E-02    | 1.907932654  |
| hsa-miR-193b#-002366      | 2.82E-03    | -7.26499913  |
| hsa-miR-194-4373106       | 3.96E-02    | 2.506272813  |
| hsa-miR-194#-002379       | 0.018152174 | -6.15708637  |
| hsa-miR-196b-4395326      | 4.78E-03    | -2.321038875 |
| hsa-miR-202-4395474       | 2.89E-02    | 3.965904896  |
| hsa-miR-202#-002362       | 3.40E-02    | -2.571330939 |
| hsa-miR-21-4373090        | 2.99E-05    | 5.82454685   |
| hsa-miR-210-4373089       | 2.76E-03    | 3.595133816  |
| hsa-miR-211-4373088       | 4.27E-02    | 2.920936927  |
| hsa-miR-212-4373087       | 1.19E-05    | 5.360547672  |
| hsa-miR-214-4395417       | 2.07E-02    | -7.005410447 |
| hsa-miR-216b-4395437      | 1.42E-02    | -2.07E+01    |
| hsa-miR-219-5p-4373080    | 4.58E-03    | 11.45617899  |
| hsa-miR-22-4373079        | 2.12E-04    | 10.53320028  |
| hsa-miR-220b-4395317      | 2.65E-02    | -2.82E+01    |
| hsa-miR-220c-4395322      | 1.35E-05    | 72645.73094  |
| hsa-miR-221-4373077       | 1.56E-02    | 3.944121406  |
| hsa-miR-222-4395387       | 1.29E-04    | 2.857903385  |
| hsa-miR-223-4395406       | 2.66E-02    | -2.153693457 |
| hsa-miR-224-4395210       | 3.71E-02    | 3.266457916  |
| hsa-miR-24-1#-002440      | 4.27E-02    | 4.830681266  |
| hsa-miR-24-2#-002441      | 1.95E-02    | 2.79290792   |
| hsa-miR-24-4373072        | 4.48E-02    | 1.727617696  |
| hsa-miR-25-4373071        | 7.81E-03    | 3.168867722  |
| hsa-miR-27a-4373287       | 1.19E-02    | 2.903229913  |
| hsa-miR-27a#-002445       | 4.43E-03    | 2.086912741  |
| hsa-miR-28-3p-4395557     | 9.74E-03    | 1.959935207  |
| hsa-miR-28-5p-4373067     | 8.08E-03    | 2.935697214  |
| hsa-miR-298-4395301       | 2.81E-02    | 9.81599444   |
| hsa-miR-29b-1#-002165     | 1.38E-03    | 5.832969458  |
| hsa-miR-29b-2#-002166     | 0.008733965 | 8.439714698  |
| hsa-miR-29b-4373288       | 0.018152174 | 3.670935111  |
| hsa-miR-302a#-002381      | 3.69E-02    | 3.468442529  |
| hsa-miR-302c#-000534      | 1.32E-04    | 46.72734746  |
| hsa-miR-302d#-002120      | 1.42E-02    | 15.01503671  |
| hsa-miR-30b-4373290       | 1.74E-02    | 2.552245456  |
| hsa-miR-30c-2#-002110     | 1.19E-05    | 9831.29403   |
| hsa-miR-30c-4373060       | 1.82E-02    | 2.376015665  |
| <b>hsa-miR-31#-002113</b> | 3.55E-03    | -3.599965344 |
| hsa-miR-320B-002844       | 3.27E-02    | 3.658125735  |
| hsa-miR-324-3p-4395272    | 1.34E-03    | 3.799683316  |

|                        |             |              |
|------------------------|-------------|--------------|
| hsa-miR-324-5p-4373052 | 3.27E-03    | 4.809948595  |
| hsa-miR-328-4373049    | 1.10E-02    | 3.459600668  |
| hsa-miR-330-3p-4373047 | 7.46E-04    | 3.504018461  |
| hsa-miR-331-3p-4373046 | 1.16E-02    | 2.284996009  |
| hsa-miR-338-5P-002658  | 4.49E-02    | 19.10631504  |
| hsa-miR-339-3p-4395295 | 1.42E-02    | 1.783263521  |
| hsa-miR-339-5p-4395368 | 4.57E-06    | 5.431052766  |
| hsa-miR-33a-002135     | 1.22E-02    | -4.878248427 |
| hsa-miR-33a#-002136    | 3.27E-02    | 2.786642187  |
| hsa-miR-342-5p-4395258 | 5.61E-06    | 8.082370398  |
| hsa-miR-346-4373038    | 8.74E-06    | 19.77404292  |
| hsa-miR-34a-4395168    | 5.76E-04    | 10.681118    |
| hsa-miR-34b-002102     | 1.82E-02    | 2.998803041  |
| hsa-miR-361-3p-002116  | 6.85E-03    | 5.23708415   |
| hsa-miR-363-4378090    | 0.043405202 | 2.245197856  |
| hsa-miR-381-4373020    | 1.02E-03    | 5.954411334  |
| hsa-miR-382-4373019    | 2.83E-04    | 10.04245433  |
| hsa-miR-422a-4395408   | 2.99E-02    | -1.857459281 |
| hsa-miR-425-4380926    | 4.44E-02    | 1.873864722  |
| hsa-miR-433-4373205    | 4.58E-05    | 12.24660243  |
| hsa-miR-452-4395440    | 4.27E-02    | -3.709429697 |
| hsa-miR-454#-001996    | 0.018152174 | -2.005389999 |
| hsa-miR-483-3p-002339  | 2.59E-03    | 8.693342372  |
| hsa-miR-483-5p-4395449 | 1.25E-02    | 2.862709767  |
| hsa-miR-490-3p-4373215 | 2.04E-04    | 10.46622322  |
| hsa-miR-491-5p-4381053 | 1.10E-02    | 3.401489337  |
| hsa-miR-500-4395539    | 9.74E-03    | 2.39457988   |
| hsa-miR-501-5p-4373226 | 0.023204132 | 3.239875065  |
| hsa-miR-502-5p-4373227 | 0.018152174 | 2.531136919  |
| hsa-miR-503-4373228    | 7.88E-03    | -5.289241176 |
| hsa-miR-505-4395200    | 3.25E-04    | 9.946869968  |
| hsa-miR-509-5p-4395346 | 1.16E-02    | 6.192205292  |
| hsa-miR-511-4373236    | 1.21E-03    | 7.178292954  |
| hsa-miR-512-3p-4381034 | 8.29E-03    | 5.949514113  |
| hsa-miR-516-3p-001149  | 1.17E-06    | 9.900354362  |
| hsa-miR-518b-4373246   | 2.01E-05    | 14.99065596  |
| hsa-miR-518d-3p-437324 | 3.67E-03    | 5.471235324  |
| hsa-miR-518e-4395506   | 1.45E-03    | 6.342488808  |
| hsa-miR-519b-3p-002384 | 1.18E-03    | 198.4781478  |
| hsa-miR-519e#-001166   | 1.65E-02    | 20.06928477  |
| hsa-miR-520D-3P-002743 | 3.73E-02    | -5.17E+01    |
| hsa-miR-523-4395497    | 1.25E-02    | -8.741683061 |
| hsa-miR-532-3p-4395466 | 3.88E-02    | 2.037763786  |
| hsa-miR-541#-002200    | 2.67E-03    | 13.55644133  |
| hsa-miR-545#-002266    | 1.16E-02    | -3.397616128 |
| hsa-miR-550-001544     | 7.80E-03    | -2.726772985 |
| hsa-miR-551a-001519    | 6.33E-03    | -4.28E+02    |
| hsa-miR-552-001520     | 5.02E-03    | -5.008521074 |
| hsa-miR-554-001522     | 1.53E-03    | -7.213886654 |
| hsa-miR-564-001531     | 3.06E-03    | 4.729719943  |
| hsa-miR-571-001613     | 5.01E-05    | 26.34572571  |
| hsa-miR-572-001614     | 4.17E-02    | 4.209140668  |
| hsa-miR-579-4395509    | 7.93E-03    | 4.449231119  |



|                        |             |              |
|------------------------|-------------|--------------|
| hsa-miR-589-001543     | 4.49E-02    | 2.248689528  |
| hsa-miR-590-3P-002677  | 1.12E-06    | -6.148265339 |
| hsa-miR-596-001550     | 3.78E-03    | 3.475990106  |
| hsa-miR-598-4395179    | 3.46E-02    | 2.419220487  |
| hsa-miR-603-001566     | 1.10E-02    | 6.313796875  |
| hsa-miR-605-001568     | 5.54E-08    | 24.96213381  |
| hsa-miR-621-001598     | 9.55E-03    | 14.60683904  |
| hsa-miR-623-001555     | 2.15E-05    | 18.51062794  |
| hsa-miR-624-4395541    | 0.028117499 | -3.149371941 |
| hsa-miR-628-5p-4395544 | 1.85E-02    | -4.076960391 |
| hsa-miR-631-001564     | 1.10E-02    | -7.69456468  |
| hsa-miR-636-4395199    | 1.45E-04    | 4.894690324  |
| hsa-miR-638-001582     | 3.53E-05    | 18.76820952  |
| hsa-miR-639-001583     | 1.45E-02    | 5.352819212  |
| hsa-miR-642-4380995    | 3.53E-05    | 3.956162053  |
| hsa-miR-643-001594     | 5.61E-06    | 21.77515273  |
| hsa-miR-648-001601     | 1.64E-02    | 5.845054219  |
| hsa-miR-649-001602     | 2.85E-03    | -9.87249353  |
| hsa-miR-650-001603     | 1.85E-02    | 3.055916306  |
| hsa-miR-652-4395463    | 5.76E-04    | 4.913369207  |
| hsa-miR-658-001513     | 6.33E-03    | 170076.9646  |
| hsa-miR-659-001514     | 5.61E-06    | 29.89586624  |
| hsa-miR-660-4380925    | 2.33E-02    | 2.834791775  |
| hsa-miR-661-001606     | 1.95E-02    | 3.952455757  |
| hsa-miR-668-001992     | 3.46E-02    | -4.129300766 |
| hsa-miR-672-4395438    | 8.02E-07    | 17.79716177  |
| hsa-miR-720-002895     | 3.45E-04    | -2.997126757 |
| hsa-miR-769-5p-001998  | 2.42E-02    | 2.728704422  |
| hsa-miR-770-5p-002002  | 2.58E-02    | 4.598746269  |
| hsa-miR-9-4373285      | 1.74E-04    | 7.411103918  |
| hsa-miR-922-002152     | 5.98E-05    | -5.132132548 |
| hsa-miR-92a-4395169    | 2.89E-02    | 2.304960917  |
| hsa-miR-93-4373302     | 3.46E-02    | 2.616279329  |
| hsa-miR-935-002178     | 1.35E-05    | -1.31E+01    |
| hsa-miR-939-002182     | 1.29E-03    | 5.369590891  |
| hsa-miR-95-4373011     | 1.10E-02    | 2.713101175  |
