# Supplementary material for: MicroRNA regulation and its effects on cellular transcriptome in Human Immunodeficiency Virus-1 (HIV-1) infected individuals with distinct viral load and CD4 cell counts
Source: PubMed Central journal article supplement (PMC3680326; doi:10.1186/1471-2334-13-250), 2013-05-30

Figure S1

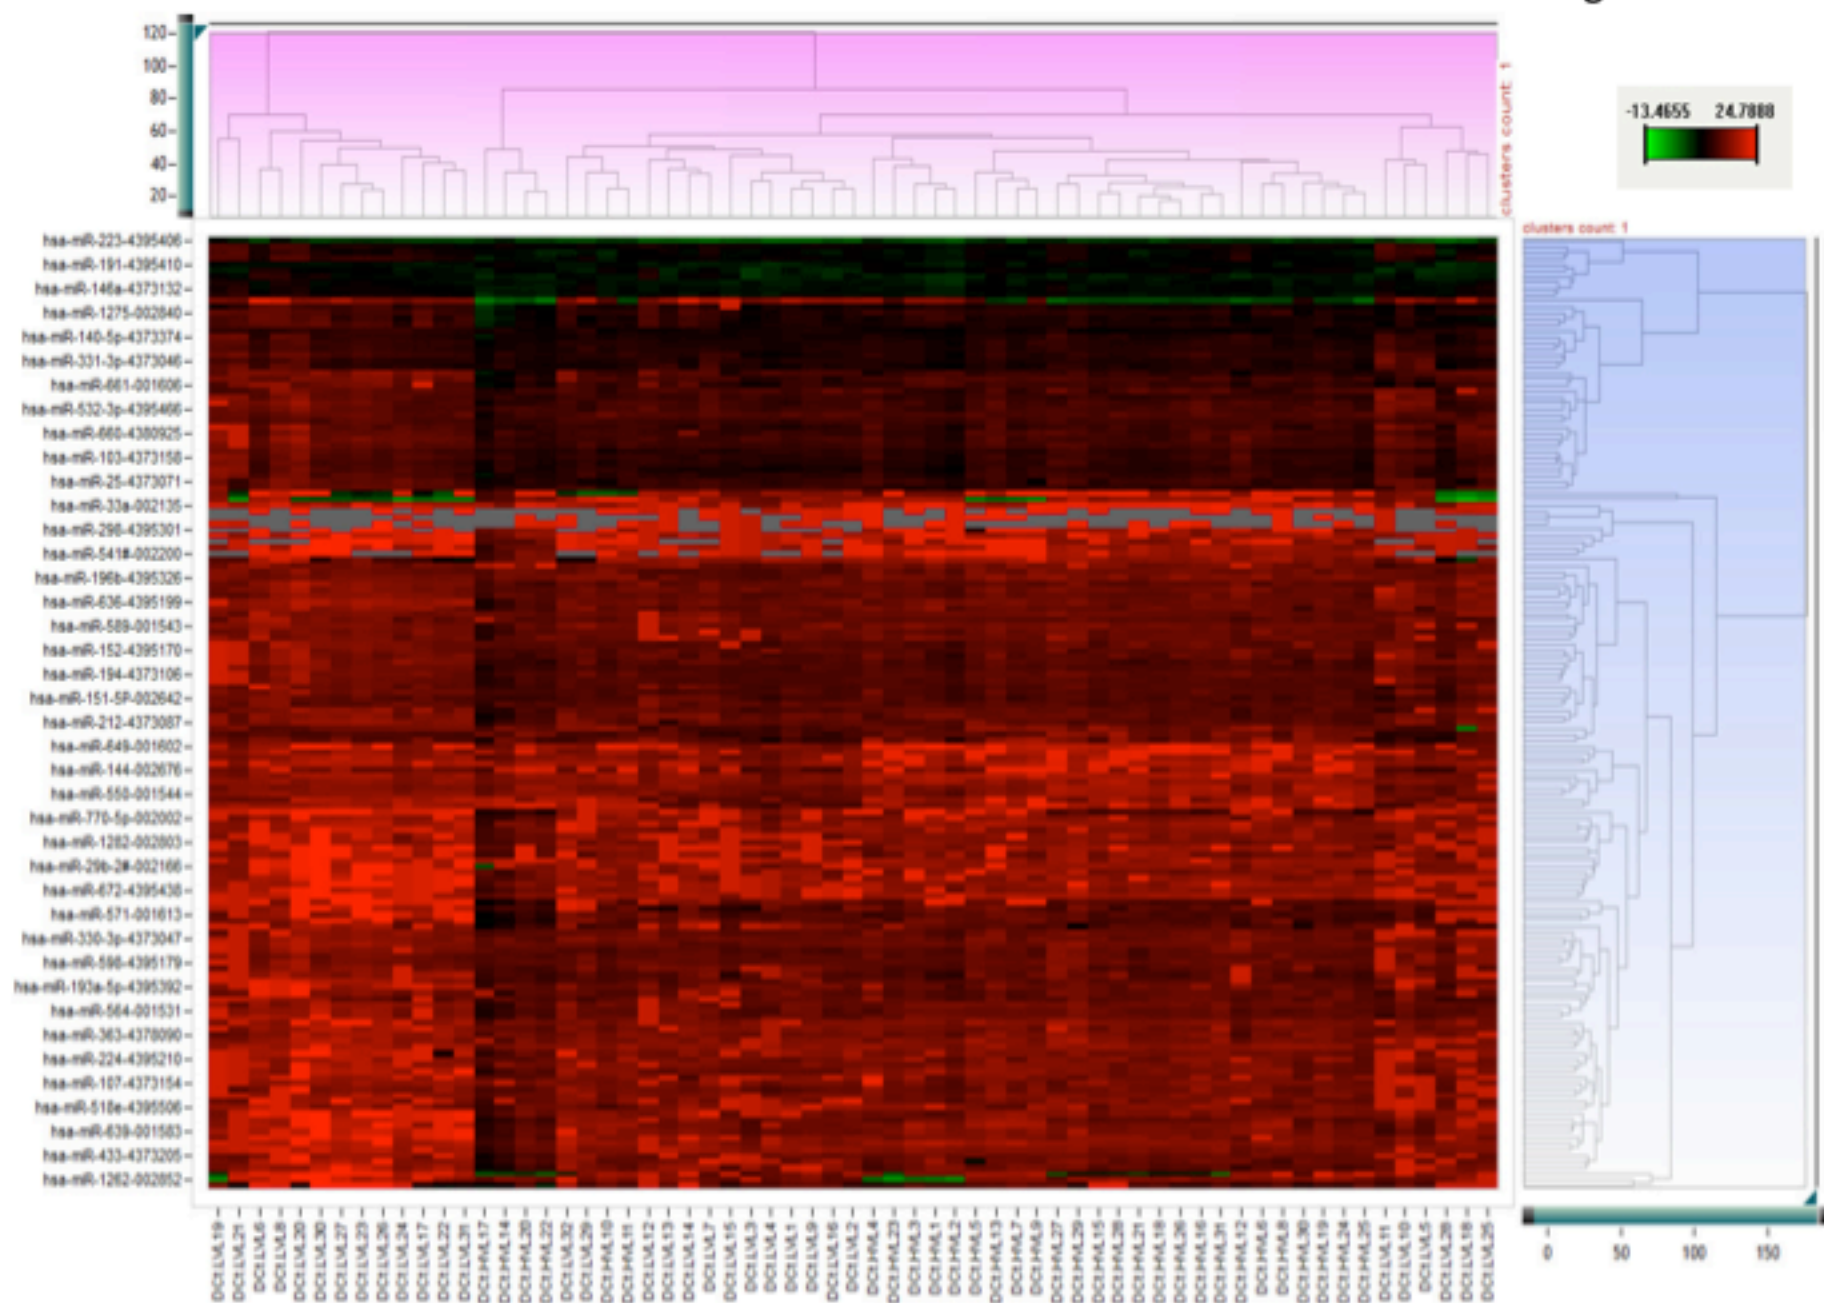

Supplement: 1471-2334-13-250-S2.pdf [file 1471-2334-13-250-S2.pdf]
