# Supplementary material for: MicroRNA regulation and its effects on cellular transcriptome in Human Immunodeficiency Virus-1 (HIV-1) infected individuals with distinct viral load and CD4 cell counts
Source: PubMed Central journal article supplement (PMC3680326; doi:10.1186/1471-2334-13-250), 2013-05-30
Supplement: 1471-2334-13-250-S3.pdf [file 1471-2334-13-250-S3.pdf]

**Table S2: Differentially regulated mRNA probes in low (LVL) and high viral load (HVL) groups compared to uninfected control group with statistical significance.**

| Control vs LVL |             |         | Control vs HVL |             |             | LVL vs HVL  |             |             |
|----------------|-------------|---------|----------------|-------------|-------------|-------------|-------------|-------------|
| Gene           | Fold change | p value | Gene Symbol    | Fold change | p value     | Gene Symbol | Fold change | p value     |
| FASTK          | -0.31       | 0.0075  | CSF3R          | -4.47       | 3.08917E-31 | RN7SK       | 2.55        | 5.74963E-19 |
| RNF165         | -0.62       | 0.0159  | FCER1A         | -4.70       | 6.2839E-30  | CPVL        | -4.61       | 1.08185E-15 |
| CD8B           | 0.84        | 0.0159  | NRGN           | -4.03       | 1.69859E-29 | LILRA5      | -2.45       | 3.14747E-15 |
| APOBEC3H       | 0.76        | 0.0159  | SC4MOL         | 2.03        | 1.43024E-28 | MGC33556    | -2.04       | 3.14747E-15 |
| RCAN1          | 0.32        | 0.0159  | CD1D           | -3.86       | 1.10664E-27 | ASGR2       | -2.83       | 1.03371E-14 |
| TNFRSF9        | 0.45        | 0.0159  | TUBB1          | -4.00       | 1.15886E-27 | ZNF467      | -3.23       | 1.32902E-14 |
| APOBEC3G       | 0.81        | 0.0182  | F13A1          | -3.90       | 1.64447E-27 | GPBAR1      | -3.07       | 1.42469E-14 |
| CDCA7          | 0.49        | 0.0198  | LAMP3          | 3.04        | 1.84997E-27 | P2RY13      | -2.48       | 2.43284E-14 |
| PCGF6          | 0.43        | 0.0210  | SEPT5          | -4.40       | 3.55374E-27 | KBTBD11     | -2.37       | 2.58391E-14 |
| KRT73          | -0.72       | 0.0210  | ZNF185         | -2.35       | 5.24159E-27 | FCN1        | -4.43       | 4.73849E-14 |
| MAPK14         | 0.48        | 0.0210  | PRAM1          | -3.29       | 6.7846E-27  | CRISPLD2    | -2.28       | 6.31281E-14 |
| CD8A           | 0.95        | 0.0210  | RBP7           | -2.34       | 6.7846E-27  | LST1        | -3.61       | 7.06224E-14 |
| COLQ           | -0.65       | 0.0281  | PADI4          | -3.41       | 8.33556E-27 | CD4         | -2.33       | 9.37294E-14 |
| HDGFRP3        | 0.52        | 0.0295  | SULF2          | -2.18       | 2.53951E-26 | CD1D        | -3.47       | 1.08847E-13 |
| HGD            | -0.57       | 0.0316  | GP9            | -3.43       | 2.7448E-26  | CSF3R       | -3.56       | 1.35361E-13 |
| LAG3           | 1.03        | 0.0316  | CCL22          | 3.46        | 3.41742E-26 | ASGR1       | -3.46       | 1.56621E-13 |
| LTB4R          | -0.50       | 0.0346  | SLC40A1        | -3.00       | 5.1597E-26  | PLEKHG3     | -2.25       | 1.59962E-13 |
| REEP3          | 0.35        | 0.0346  | ABL1           | -2.24       | 5.87983E-26 | KLF4        | -3.04       | 1.90506E-13 |
| UEVLD          | 0.48        | 0.0346  | KLF4           | -3.21       | 6.53253E-26 | S100A12     | -2.91       | 1.972E-13   |
| HDLBP          | 0.34        | 0.0368  | NFE2           | -3.88       | 6.53253E-26 | C10orf54    | -3.09       | 2.32545E-13 |
| MLST8          | -0.36       | 0.0371  | TSPAN18        | -2.51       | 1.5286E-25  | SLC40A1     | -2.33       | 2.64164E-13 |
| PPP2R3C        | 0.31        | 0.0372  | CD4            | -2.77       | 2.99654E-25 | LILRA5      | -2.25       | 3.06848E-13 |
| B3GNT2         | 0.48        | 0.0386  | LOC255809      | -2.27       | 2.99654E-25 | F13A1       | -3.19       | 3.48486E-13 |
| GCLM           | 0.34        | 0.0416  | ASGR2          | -3.29       | 6.481E-25   | SULF2       | -2.60       | 3.80433E-13 |
| IL12A          | 0.30        | 0.0416  | GPBAR1         | -3.19       | 7.84631E-25 | ALDH2       | -2.60       | 6.6544E-13  |
| TMEM110        | 0.33        | 0.0416  | SDPR           | -3.54       | 9.46121E-25 | SIGLEC10    | -2.96       | 6.91658E-13 |
| GALK2          | 0.44        | 0.0416  | CDA            | -2.52       | 3.5875E-24  | LST1        | -2.81       | 7.32989E-13 |
| COLQ           | -0.49       | 0.0426  | FCN1           | -4.84       | 4.11135E-24 | FPR1        | -3.02       | 8.08659E-13 |
| RAB28          | 0.47        | 0.0426  | ASGR2          | -2.88       | 4.22835E-24 | FLJ22662    | -3.23       | 8.43339E-13 |
| APOL6          | 0.58        | 0.0426  | SULF2          | -3.15       | 6.82333E-24 | ASGR2       | -2.25       | 9.40448E-13 |
| SCD            | 0.61        | 0.0427  | RN7SK          | 2.59        | 7.79154E-24 | PRAM1       | -2.68       | 1.10027E-12 |
| UBE2G1         | 0.43        | 0.0427  | VENTX          | -2.48       | 8.99069E-24 | MS4A6A      | -3.71       | 1.38325E-12 |
| NIPA2          | 0.29        | 0.0442  | CDH23          | -2.29       | 9.14248E-24 | PTGR1       | 2.11        | 3.10083E-12 |
| KIAA1671       | 0.56        | 0.0442  | INDO           | 5.18        | 1.4433E-23  | NFE2        | -3.25       | 3.60162E-12 |
| RAB27A         | 0.50        | 0.0442  | C22orf32       | -2.26       | 3.75003E-23 | CDA         | -2.23       | 4.83786E-12 |
| CCL4L2         | 0.83        | 0.0442  | CLK1           | 2.31        | 7.04953E-23 | UBE2L3      | -2.64       | 5.16536E-12 |
| RPL29          | 0.44        | 0.0442  | CREB5          | -2.08       | 8.29337E-23 | LOC255809   | -2.08       | 5.42148E-12 |
| PPP2R5C        | 0.63        | 0.0442  | GPR68          | 2.69        | 9.42092E-23 | NRGN        | -3.06       | 5.42148E-12 |
| SERPINB9       | 0.49        | 0.0442  | TBC1D2B        | 2.33        | 1.26722E-22 | HSPA1B      | 2.33        | 6.78208E-12 |
| DDX28          | -0.26       | 0.0471  | IRS2           | -2.12       | 1.55104E-22 | GARNL4      | -2.19       | 8.15183E-12 |
| PDE5A          | -0.77       | 0.0471  | SH3BGRL2       | -2.20       | 1.57529E-22 | CD33        | -2.54       | 8.46584E-12 |

|           |       |             |
|-----------|-------|-------------|
| FOSB      | -4.20 | 2.54795E-22 |
| MS4A6A    | -4.15 | 2.54795E-22 |
| FASLG     | 2.31  | 4.57399E-22 |
| H3F3B     | -2.32 | 4.57399E-22 |
| FLJ22662  | -3.56 | 4.67931E-22 |
| CEBPD     | -2.54 | 4.75611E-22 |
| SLC7A11   | 3.21  | 5.38607E-22 |
| CD302     | -2.95 | 6.26405E-22 |
| NCR3      | -2.30 | 8.18219E-22 |
| SIGLEC10  | -3.33 | 8.64867E-22 |
| HSPA1B    | 2.91  | 9.25685E-22 |
| ADAM15    | -2.17 | 9.81688E-22 |
| CPVL      | -4.91 | 1.15484E-21 |
| UBE2L3    | -2.89 | 1.18986E-21 |
| VIPR1     | -2.03 | 1.31218E-21 |
| ZNF467    | -3.60 | 1.59469E-21 |
| CSF3R     | -2.79 | 3.14563E-21 |
| ACRBP     | -2.83 | 3.67724E-21 |
| MTMR11    | -2.71 | 3.69239E-21 |
| TXN       | 2.33  | 3.85281E-21 |
| CRIP2     | -2.39 | 3.92003E-21 |
| IFIH1     | 2.08  | 4.00766E-21 |
| EGR1      | -2.71 | 4.35058E-21 |
| IFI27     | 5.17  | 4.60582E-21 |
| KBTBD11   | -2.76 | 6.47045E-21 |
| TESC      | -2.44 | 6.60751E-21 |
| ADAMDEC1  | 4.07  | 6.87542E-21 |
| LY86      | -2.53 | 8.47364E-21 |
| PTCRA     | -2.56 | 1.48972E-20 |
| LOC338758 | -2.56 | 2.58937E-20 |
| GARNL4    | -2.55 | 2.63198E-20 |
| MGC33556  | -2.32 | 2.80479E-20 |
| RSAD2     | 3.34  | 4.20905E-20 |
| DYSF      | -2.80 | 6.58576E-20 |
| IMPA2     | -2.72 | 7.50398E-20 |
| MMP25     | -2.69 | 7.55962E-20 |
| P2RY13    | -2.60 | 1.05184E-19 |
| C10orf54  | -3.49 | 1.25172E-19 |
| DFNA5     | 2.76  | 1.25695E-19 |
| TCEA3     | -2.45 | 1.3157E-19  |
| PELI2     | -2.36 | 1.51885E-19 |
| ESAM      | -2.14 | 1.71834E-19 |
| BCL11A    | -2.01 | 1.98487E-19 |
| NPC1      | 2.03  | 1.98487E-19 |
| IFI44     | 2.26  | 2.08457E-19 |
| SERPINB2  | 4.42  | 2.20944E-19 |
| FOLR3     | -3.36 | 2.70063E-19 |

|          |       |             |
|----------|-------|-------------|
| LYZ      | -2.95 | 1.10873E-11 |
| PADI4    | -2.82 | 1.23022E-11 |
| DYSF     | -2.49 | 1.31783E-11 |
| PTCRA    | -2.06 | 1.55681E-11 |
| FCER1A   | -3.71 | 1.55691E-11 |
| TESC     | -2.19 | 1.57962E-11 |
| MS4A6A   | -3.51 | 2.16497E-11 |
| CD302    | -2.53 | 2.59293E-11 |
| SERPINA1 | -2.15 | 2.59293E-11 |
| CFD      | -3.55 | 3.4223E-11  |
| GPBAR1   | -2.03 | 3.78848E-11 |
| AIF1     | -2.53 | 4.18679E-11 |
| CSF3R    | -2.17 | 4.4846E-11  |
| S100P    | -3.41 | 5.83731E-11 |
| LILRA2   | -2.59 | 7.6603E-11  |
| SDPR     | -2.51 | 8.07423E-11 |
| MTMR11   | -2.40 | 8.52348E-11 |
| IFI27    | 4.12  | 9.48695E-11 |
| TUBB1    | -2.97 | 1.26546E-10 |
| SLC7A11  | 2.75  | 1.36916E-10 |
| AIF1     | -2.59 | 1.38315E-10 |
| FOSB     | -3.56 | 1.39319E-10 |
| RNASE2   | -2.77 | 1.54899E-10 |
| S100A8   | -2.06 | 2.05669E-10 |
| GP9      | -2.63 | 2.15243E-10 |
| LGALS2   | -2.51 | 2.33067E-10 |
| CD300LF  | -2.19 | 2.38995E-10 |
| FOLR3    | -2.97 | 2.796E-10   |
| ACRBP    | -2.07 | 3.35451E-10 |
| SEPT5    | -3.37 | 4.37179E-10 |
| FOS      | -3.34 | 4.56405E-10 |
| CST3     | -2.39 | 7.6249E-10  |
| SERPINB2 | 3.66  | 7.66078E-10 |
| SERPINB2 | 3.96  | 8.28068E-10 |
| KYNU     | 2.11  | 9.32262E-10 |
| CLEC7A   | -2.48 | 9.43527E-10 |
| LY86     | -2.07 | 1.05078E-09 |
| KLF11    | -2.11 | 1.18605E-09 |
| RSAD2    | 2.78  | 1.70691E-09 |
| MNDA     | -2.40 | 1.71484E-09 |
| KLF10    | -2.02 | 1.92444E-09 |
| DFNA5    | 2.25  | 2.63572E-09 |
| MS4A6A   | -2.98 | 2.86333E-09 |
| ALDH1A1  | -2.45 | 3.71077E-09 |
| CLEC7A   | -2.35 | 3.85728E-09 |
| IL1A     | 3.39  | 4.16978E-09 |
| EGR1     | -2.18 | 4.51329E-09 |

|          |       |             |
|----------|-------|-------------|
| PTGDS    | -2.22 | 2.71536E-19 |
| LST1     | -4.00 | 2.82377E-19 |
| SERPINB2 | 4.76  | 3.0353E-19  |
| ASGR1    | -3.81 | 3.89103E-19 |
| CAMP     | -3.82 | 4.19281E-19 |
| LST1     | -3.16 | 4.82681E-19 |
| TOP1MT   | -2.13 | 5.12317E-19 |
| NLRP12   | -2.04 | 5.26186E-19 |
| NACC2    | -2.24 | 6.29934E-19 |
| RNASE2   | -2.80 | 7.62484E-19 |
| CTTN     | -2.31 | 8.21113E-19 |
| ALDH1A1  | -2.11 | 9.11421E-19 |
| TMEM91   | -2.19 | 1.03396E-18 |
| PTGS1    | -2.53 | 1.15197E-18 |
| CFD      | -4.08 | 1.18566E-18 |
| EPSTI1   | 2.81  | 1.20529E-18 |
| LILRA5   | -2.45 | 1.39565E-18 |
| GNG11    | -2.84 | 1.45371E-18 |
| ZNF101   | -2.27 | 2.12786E-18 |
| MGC13057 | -2.33 | 2.30681E-18 |
| APOBEC3G | 2.03  | 3.02425E-18 |
| RGL1     | 3.38  | 3.02425E-18 |
| ALDH2    | -2.92 | 3.2747E-18  |
| ADAMDEC1 | 3.01  | 5.10843E-18 |
| GBP4     | 2.03  | 5.21671E-18 |
| S100P    | -3.86 | 5.31152E-18 |
| C15orf48 | 3.36  | 5.80753E-18 |
| KYNU     | 2.67  | 6.24512E-18 |
| APOBEC3G | 2.06  | 8.24566E-18 |
| OAS2     | 2.31  | 8.34597E-18 |
| PLA2G7   | 3.62  | 9.91615E-18 |
| GPBAR1   | -2.04 | 1.02265E-17 |
| IFI44L   | 3.51  | 1.08176E-17 |
| C15orf48 | 4.55  | 1.33969E-17 |
| FPR1     | -3.32 | 1.48722E-17 |
| CRISPLD2 | -2.34 | 1.61757E-17 |
| HDC      | -2.68 | 1.78142E-17 |
| ETNK1    | -2.21 | 1.79279E-17 |
| FLJ14213 | 2.24  | 2.05628E-17 |
| LILRA5   | -2.53 | 2.23675E-17 |
| HSPA1A   | 2.13  | 2.3059E-17  |
| IL1A     | 3.95  | 2.73317E-17 |
| RRP12    | -2.42 | 3.01283E-17 |
| UBXN11   | -2.01 | 3.0378E-17  |
| LCN2     | -2.22 | 3.17245E-17 |
| ALDH1A1  | -2.60 | 3.42898E-17 |
| TIGIT    | 2.06  | 4.58636E-17 |

|           |       |             |
|-----------|-------|-------------|
| SERPINA1  | -2.16 | 5.03785E-09 |
| TXN       | 2.01  | 5.31189E-09 |
| TSPAN32   | -2.10 | 5.85454E-09 |
| LOC338758 | -2.04 | 1.07979E-08 |
| MGST2     | -2.00 | 1.11041E-08 |
| GAS7      | -2.04 | 1.11112E-08 |
| IMPA2     | -2.17 | 1.16E-08    |
| ALDH1A1   | -2.04 | 1.4097E-08  |
| RNASE3    | -2.26 | 1.61852E-08 |
| CXCL5     | 4.04  | 1.72056E-08 |
| CAMP      | -3.34 | 1.77376E-08 |
| IFI44L    | 2.66  | 1.94135E-08 |
| CXCL2     | 2.70  | 2.24289E-08 |
| CXCL5     | 4.07  | 2.42701E-08 |
| ADAMDEC1  | 3.16  | 3.26322E-08 |
| FCGR3B    | -2.84 | 3.51925E-08 |
| TNIP3     | 2.05  | 3.84323E-08 |
| GPR68     | 2.01  | 3.97374E-08 |
| C15orf48  | 3.87  | 4.49847E-08 |
| GNG11     | -2.08 | 4.75031E-08 |
| CLEC12A   | -2.64 | 4.94018E-08 |
| PLA2G7    | 2.84  | 5.01621E-08 |
| IL24      | 2.63  | 6.21772E-08 |
| LAMP3     | 2.38  | 6.62223E-08 |
| CYP1B1    | 2.14  | 8.12779E-08 |
| CTSL1     | 3.20  | 9.17511E-08 |
| DEFA3     | -5.12 | 9.6738E-08  |
| ADAMDEC1  | 2.39  | 9.90247E-08 |
| DEFA4     | -2.86 | 1.11436E-07 |
| FGL2      | -2.24 | 1.16369E-07 |
| DEFA1     | -5.13 | 1.27624E-07 |
| CCL3      | 2.42  | 1.38752E-07 |
| C15orf48  | 2.75  | 1.41724E-07 |
| CTSL1     | 3.01  | 1.45093E-07 |
| CCL3L3    | 2.47  | 1.53625E-07 |
| IL6       | 3.28  | 1.71139E-07 |
| CCL3L1    | 2.42  | 1.73813E-07 |
| IL19      | 2.17  | 1.79719E-07 |
| CCL20     | 2.68  | 2.05136E-07 |
| KYNU      | 2.07  | 2.38878E-07 |
| CD36      | -2.85 | 2.43704E-07 |
| TNFAIP6   | 2.45  | 2.48691E-07 |
| DEFA1B    | -4.07 | 2.99217E-07 |
| DEFA1B    | -3.96 | 3.23549E-07 |
| CLC       | -2.91 | 3.52076E-07 |
| CD36      | -2.64 | 4.16825E-07 |
| IL19      | 2.11  | 5.37336E-07 |

|          |       |             |
|----------|-------|-------------|
| LGALS2   | -2.79 | 4.65195E-17 |
| CACNA2D3 | -2.04 | 8.29607E-17 |
| CTSL1    | 3.74  | 8.39503E-17 |
| PTGR1    | 2.26  | 1.0145E-16  |
| S100A4   | -2.10 | 1.07747E-16 |
| PECAM1   | -2.09 | 1.2719E-16  |
| KLF11    | -2.55 | 1.41761E-16 |
| CTSL1    | 3.98  | 1.41782E-16 |
| PMP22    | 2.65  | 1.69748E-16 |
| GBP1     | 2.68  | 1.75688E-16 |
| MT1G     | 4.93  | 2.00856E-16 |
| GRASP    | -2.24 | 2.19423E-16 |
| DEFA1    | -5.60 | 2.22304E-16 |
| S100A12  | -2.90 | 2.24348E-16 |
| OAF      | -2.06 | 2.5316E-16  |
| CD33     | -2.64 | 2.56184E-16 |
| MPL      | -2.35 | 2.64101E-16 |
| C1orf162 | -2.13 | 3.20636E-16 |
| TSPAN9   | -2.33 | 3.78347E-16 |
| CCL3     | 3.36  | 4.11467E-16 |
| SLC39A8  | 2.40  | 4.54052E-16 |
| EOMES    | 2.53  | 5.22693E-16 |
| FOS      | -3.77 | 5.27815E-16 |
| GK       | 2.22  | 5.27815E-16 |
| CCL4L2   | 2.55  | 6.23611E-16 |
| MS4A6A   | -3.19 | 6.52902E-16 |
| PLSCR1   | 2.21  | 7.1144E-16  |
| ACTA2    | 2.12  | 7.45184E-16 |
| MS4A6A   | -3.69 | 7.80237E-16 |
| TMEM154  | -2.24 | 8.82659E-16 |
| WWP2     | -2.22 | 8.83608E-16 |
| TNIP3    | 2.49  | 9.71886E-16 |
| CXCL5    | 4.53  | 1.11414E-15 |
| PLEKHG3  | -2.33 | 1.33664E-15 |
| TSPAN32  | -2.58 | 1.33664E-15 |
| VCAM1    | 2.01  | 1.82089E-15 |
| BST1     | -2.08 | 2.28021E-15 |
| GK       | 2.28  | 2.43187E-15 |
| TXN      | 2.59  | 3.56663E-15 |
| GBP1     | 2.50  | 3.70877E-15 |
| CCL8     | 5.11  | 4.31348E-15 |
| MAL      | -2.48 | 4.71171E-15 |
| ITGAM    | -2.20 | 4.81262E-15 |
| IL4I1    | 2.45  | 5.51817E-15 |
| CXCL5    | 4.58  | 6.3312E-15  |
| CCL3L1   | 3.16  | 7.48114E-15 |
| CMTM2    | -3.39 | 8.79261E-15 |

|           |       |             |
|-----------|-------|-------------|
| CCL22     | 2.67  | 6.57089E-07 |
| CMTM2     | -2.56 | 6.97104E-07 |
| FCGR1B    | -2.22 | 7.03686E-07 |
| INDO      | 3.85  | 8.13923E-07 |
| LOC653600 | -3.00 | 9.45288E-07 |
| EMP1      | 2.38  | 1.01688E-06 |
| CCL3L1    | 2.49  | 1.29932E-06 |
| IL8RB     | -2.01 | 1.42228E-06 |
| CLEC12A   | -2.01 | 1.42247E-06 |
| RGL1      | 2.57  | 1.46892E-06 |
| PMP22     | 2.05  | 1.57314E-06 |
| MT1G      | 3.87  | 1.77544E-06 |
| PGLYRP1   | -2.02 | 1.80649E-06 |
| VNN2      | -2.25 | 3.0958E-06  |
| EBI3      | 2.11  | 3.18909E-06 |
| IL1B      | 2.47  | 4.19842E-06 |
| CTSL1     | 2.75  | 4.20813E-06 |
| PI3       | -2.10 | 4.84609E-06 |
| OLR1      | 3.00  | 6.66138E-06 |
| GOS2      | -2.12 | 9.90973E-06 |
| CCL2      | 3.95  | 1.4194E-05  |
| VCAN      | -2.19 | 1.65714E-05 |
| MT1H      | 3.29  | 2.14549E-05 |
| THBS1     | 2.50  | 2.57742E-05 |
| CCL8      | 3.89  | 5.18302E-05 |
| PMP22     | 2.51  | 7.0973E-05  |
| SLC16A10  | 2.03  | 7.49933E-05 |
| MT1M      | 2.61  | 0.000161575 |
| GPMB      | 2.03  | 0.00068177  |
| CCL7      | 2.80  | 0.002497504 |
| MMP9      | 2.12  | 0.005380915 |

|         |       |             |
|---------|-------|-------------|
| MGST2   | -2.33 | 1.12634E-14 |
| MS4A3   | -2.13 | 1.21241E-14 |
| STAT1   | 2.15  | 1.40578E-14 |
| MT2A    | 2.34  | 1.4466E-14  |
| KYNU    | 2.62  | 1.58792E-14 |
| HK3     | -2.10 | 1.77897E-14 |
| CLEC1B  | -2.49 | 1.93053E-14 |
| FCGR3B  | -3.51 | 2.16455E-14 |
| IL6     | 4.01  | 2.2412E-14  |
| LYZ     | -3.07 | 2.33199E-14 |
| CD8A    | 2.03  | 2.44667E-14 |
| CTSL1   | 3.62  | 2.5176E-14  |
| RASGRP2 | -2.04 | 3.43329E-14 |
| MT1H    | 4.39  | 4.26585E-14 |
| EBI3    | 2.66  | 4.44194E-14 |
| FCER2   | -2.03 | 4.66219E-14 |
| DEFA3   | -5.28 | 5.87893E-14 |
| S100A8  | -2.20 | 6.05402E-14 |
| CST3    | -2.62 | 6.91289E-14 |
| CCL3L3  | 2.86  | 8.82671E-14 |
| OASL    | 2.27  | 1.05933E-13 |
| CLEC7A  | -2.82 | 1.1735E-13  |
| DEFA1B  | -4.06 | 1.19909E-13 |
| CD300LF | -2.37 | 1.81105E-13 |
| GAS7    | -2.46 | 3.10926E-13 |
| ANKRD22 | 2.58  | 5.36664E-13 |
| CLC     | -3.76 | 6.17418E-13 |
| DEFA1B  | -3.97 | 6.83043E-13 |
| EMR3    | -2.03 | 1.09145E-12 |
| LILRA2  | -2.71 | 1.48517E-12 |
| ISG15   | 2.07  | 1.55015E-12 |
| LAG3    | 2.29  | 1.76293E-12 |
| OLR1    | 3.80  | 2.00409E-12 |
| TNFAIP6 | 2.89  | 2.03457E-12 |
| CLEC12A | -2.22 | 2.22845E-12 |
| CXCL2   | 2.97  | 2.98962E-12 |
| CLEC7A  | -2.65 | 3.38696E-12 |
| PYGL    | -2.01 | 3.4907E-12  |
| CXCL10  | 3.22  | 3.70783E-12 |
| IL8RB   | -2.61 | 3.70808E-12 |
| TMEM51  | 2.26  | 5.10541E-12 |
| CCL3L1  | 3.06  | 5.1372E-12  |
| PGLYRP1 | -2.24 | 5.84565E-12 |
| CYP1B1  | 2.47  | 7.41646E-12 |
| AIF1    | -2.67 | 7.62445E-12 |
| MT1A    | 2.39  | 7.66469E-12 |
| PMP22   | 3.27  | 1.01184E-11 |

|           |       |             |
|-----------|-------|-------------|
| TREM1     | -2.42 | 1.17539E-11 |
| MT1E      | 2.73  | 1.97499E-11 |
| MTE       | 2.21  | 2.23045E-11 |
| IL1B      | 3.11  | 2.83655E-11 |
| AIF1      | -2.61 | 3.23728E-11 |
| CTSS      | -2.07 | 4.06676E-11 |
| CD36      | -3.08 | 4.08456E-11 |
| SELL      | -2.06 | 4.62691E-11 |
| CLEC12A   | -2.55 | 5.52244E-11 |
| CCL2      | 4.53  | 6.47935E-11 |
| SLC16A10  | 2.45  | 7.83853E-11 |
| RGS18     | -2.52 | 8.94012E-11 |
| EMP1      | 2.62  | 1.08689E-10 |
| SERPINA1  | -2.23 | 1.14818E-10 |
| MT1M      | 3.36  | 1.22356E-10 |
| GOS2      | -2.38 | 1.29387E-10 |
| KIAA1199  | 2.74  | 1.44367E-10 |
| TCN1      | -2.23 | 2.06589E-10 |
| IL19      | 2.36  | 2.73108E-10 |
| CCL20     | 2.97  | 2.89921E-10 |
| KRT72     | -2.10 | 4.2269E-10  |
| MME       | -2.37 | 4.34231E-10 |
| MNDA      | -2.31 | 5.05325E-10 |
| CD36      | -2.78 | 6.56495E-10 |
| IL24      | 2.72  | 7.87686E-10 |
| MT1X      | 2.01  | 1.90526E-09 |
| VCAN      | -2.70 | 2.73249E-09 |
| IL19      | 2.26  | 3.32635E-09 |
| CCL24     | 2.19  | 3.88096E-09 |
| PI3       | -2.57 | 3.90308E-09 |
| FGL2      | -2.21 | 5.66177E-09 |
| LOC653600 | -2.51 | 7.42818E-09 |
| GPNMB     | 2.79  | 1.01482E-08 |
| DEFA4     | -2.29 | 1.76729E-08 |
| IFIT1     | 2.07  | 2.03323E-08 |
| PROK2     | -2.05 | 5.2929E-08  |
| ALAS2     | -2.34 | 5.66718E-08 |
| LOC730249 | 2.22  | 5.67352E-08 |
| IFNG      | 2.73  | 6.28227E-08 |
| FPR3      | 2.67  | 7.83368E-08 |
| SLC39A8   | 2.11  | 1.97899E-07 |
| CCL3L1    | 2.22  | 1.98038E-07 |
| CCL7      | 3.61  | 3.00985E-07 |
| CCL13     | 2.27  | 3.68047E-07 |
| SERPINA1  | -2.05 | 4.39056E-07 |
| MMP9      | 2.96  | 1.00968E-06 |
| IL8       | 2.00  | 1.07607E-06 |

|        |       |             |
|--------|-------|-------------|
| CD93   | -2.03 | 1.4849E-06  |
| THBS1  | 2.29  | 2.20276E-06 |
| VNN2   | -2.20 | 4.24463E-06 |
| RNASE1 | 2.09  | 4.49623E-05 |
